# Supplementary material for: Evaluation of the socially evaluated cold-pressor group test (SECPT-G) in the general population
Source: PeerJ. 2019 Aug 13;7:e7521. doi: 10.7717/peerj.7521 (PMC6697040; doi:10.7717/peerj.7521)
Supplement: Supplemental Information 2 [file peerj-07-7521-s002.xlsx]

## Sheet: Tabelle1
S2 - Codebook
Variable	Value	Label
Sex	0	Male
	1	Female
	2	Other
Bmi_group	1	Underweight
	2	Normal weight
	3	Pre-obese
	4	Obese
Nationality	0	German
	1	Austrian
	2	Other
Education	0	Certificate of secondary education ('Hauptschulabschluss')
	1	Secondary school level ('Mittlere Reife')
	2	Graduation ('Ausbildung')
	3	Vocational diploma ('Fachabitur')
	4	General qualification for university entrance ('Abitur')
	5	Bachelor degree
	6	Diploma or master degree
	7	PhD
	8	Other
Profession	0	Student
	1	Full-time employee
	2	Graduation
	3	Part-time employee
	4	PhD student
	5	Retired
	6	Self-employed
	7	Unemployed
	8	Other
Smoking	0	No
	1	Yes
Caffeine	0	No
	1	Yes
Alcohol_today	0	No
	1	Yes
Contraceptives	0	No
	1	Yes
IPAQ_category	1	Low
	2	Moderate
	3	High
TICS_group	0	Low chronic stress
	1	High chronic stress
SECPT_performance	0	Winner
	1	Loser
